# Supplementary material
Source: PubMed Central journal article supplement (PMC5533620)
Supplement: NIHMS850343-supplement-supplement_1.pdf [file NIHMS850343-supplement-supplement_1.pdf]

**Supplementary Table S1** Cumulative risk for celiac disease autoimmunity (CDA) for each HLA genotype after 5, 10 and 15 years follow-up.

**Table S1**

| HLA             | Years of follow-up | Number of cumulative events for CDA | Cumulative risk for CDA (%) | Lower CI (%) | Upper CI (%) |
|-----------------|--------------------|-------------------------------------|-----------------------------|--------------|--------------|
| DR3-DQ2/DR3-DQ2 | 5                  | 13                                  | 14.8                        | 9.6          | 22.4         |
|                 | 10                 | 19                                  | 22.1                        | 15.9         | 30.3         |
|                 | 15                 | 21                                  | 26.4                        | 19.5         | 35.1         |
| DR3-DQ2/DR4-DQ8 | 5                  | 18                                  | 8.1                         | 5.8          | 11.4         |
|                 | 10                 | 38                                  | 14.6                        | 11.4         | 18.6         |
|                 | 15                 | 39                                  | 15.1                        | 11.9         | 19.2         |
| DR3-DQ2/X       | 5                  | 9                                   | 10.6                        | 7.2          | 15.3         |
|                 | 10                 | 22                                  | 17.1                        | 12.9         | 22.4         |
|                 | 15                 | 24                                  | 18.4                        | 14.1         | 23.9         |
| DR4-DQ8/DR4-DQ8 | 5                  | 2                                   | 2.7                         | 0.8          | 8.1          |
|                 | 10                 | 10                                  | 11.5                        | 7.2          | 18.1         |
|                 | 15                 | 10                                  | 11.5                        | 7.2          | 18.1         |
| DR4-DQ8/X       | 5                  | 3                                   | 0.9                         | 0.3          | 2.5          |
|                 | 10                 | 8                                   | 3.1                         | 1.8          | 5.3          |
|                 | 15                 | 14                                  | 5.7                         | 3.9          | 8.3          |

**Supplementary Table S2** Cumulative risk for celiac disease (CD) (Table S1B) for each HLA genotype after 5, 10 and 15 years follow-up.

**Table S2**

| HLA             | Years of follow-up | Number of cumulative events for CD | Cumulative risk for CD (%) | Lower CI (%) | Upper CI (%) |
|-----------------|--------------------|------------------------------------|----------------------------|--------------|--------------|
| DR3-DQ2/DR3-DQ2 | 5                  | 8                                  | 9.8                        | 5.7          | 16.7         |
|                 | 10                 | 12                                 | 14.2                       | 9.2          | 21.5         |
|                 | 15                 | 13                                 | 14.2                       | 9.2          | 21.5         |
| DR3-DQ2/DR4-DQ8 | 5                  | 12                                 | 4.9                        | 3.1          | 7.6          |
|                 | 10                 | 24                                 | 9.2                        | 6.7          | 12.6         |
|                 | 15                 | 24                                 | 9.2                        | 6.7          | 12.6         |
| DR3-DQ2/X       | 5                  | 8                                  | 7.7                        | 4.9          | 11.9         |
|                 | 10                 | 16                                 | 12.3                       | 8.8          | 17.1         |
|                 | 15                 | 18                                 | 13.6                       | 9.9          | 18.6         |
| DR4-DQ8/DR4-DQ8 | 5                  | 1                                  | 1.0                        | 0.2          | 5.2          |
|                 | 10                 | 4                                  | 4.5                        | 2.1          | 9.6          |
|                 | 15                 | 4                                  | 4.5                        | 2.1          | 9.6          |
| DR4-DQ8/X       | 5                  | 1                                  | 0.3                        | 0.1          | 1.6          |
|                 | 10                 | 3                                  | 1.5                        | 0.7          | 3.1          |
|                 | 15                 | 4                                  | 1.5                        | 0.7          | 3.1          |
